# Supplementary material for: Medium-term impact of the economic crisis on mortality, health-related behaviours and access to healthcare in Greece
Source: PubMed Central journal article supplement (PMC5385490; doi:10.1038/srep46423), 2017-04-10
Supplement: srep46423-s1.pdf [file srep46423-s1.pdf]

**Medium-term impact of the economic crisis on mortality, health-related behaviours and access to healthcare in Greece**

Filippos T. Filippidis<sup>1,2</sup>, Vasiliki Gerovasili<sup>3</sup>, Christopher Millett<sup>1</sup>, Yannis Tountas<sup>2</sup>

<sup>1</sup> Department of Primary Care and Public Health, School of Public Health, Imperial College London, United Kingdom

<sup>2</sup> Center for Health Services Research, School of Medicine, National and Kapodistrian University of Athens, Athens, Greece

<sup>3</sup> Department of Respiratory Medicine, Harefield Hospital, Royal Brompton & Harefield NHS Foundation Trust, London, United Kingdom

**Supplementary Table S1. Macroeconomic indicators in Greece, 2009-2014**

|                                                                         | 2009   | 2010   | 2011   | 2012   | 2013   | 2014   | Change 2009-2014 |
|-------------------------------------------------------------------------|--------|--------|--------|--------|--------|--------|------------------|
| GDP per capita (€)                                                      | 21,386 | 20,324 | 18,643 | 17,311 | 16,451 | 16,250 | -25.6%           |
| Government expenditure on healthcare (US\$ PPP)                         | 2,971  | 2,645  | 2,598  | 2,319  | 2,357  | 2,098  | -29.4%           |
| Unemployment                                                            | 9.6%   | 12.7%  | 17.9%  | 24.4%  | 27.5%  | 26.5%  | +176.0%          |
| Gini coefficient                                                        | 33.1   | 32.9   | 33.6   | 34.3   | 34.4   | 34.5   | +4.2%            |
| Seasonally adjusted Wage Index                                          | 113.0  | 111.4  | 106.2  | 96.1   | 88.8   | 90.4   | -20.0%           |
| At-risk-of-poverty after social transfers <sup>a</sup>                  | 19.7%  | 20.1%  | 21.4%  | 23.1%  | 23.1%  | 22.1%  | +12.2%           |
| At-risk-of-poverty anchored at a fixed moment in year 2005 <sup>b</sup> | 16.4%  | 16.3%  | 22.9%  | 32.3%  | 40.0%  | 42.7%  | +160.4%          |
| Living in households with very low work intensity <sup>c</sup>          | 6.5%   | 7.5%   | 11.8%  | 16.1%  | 19.6%  | 19.4%  | +198.5%          |
| Material deprivation <sup>d</sup>                                       | 23.0%  | 24.1%  | 28.4%  | 33.7%  | 37.3%  | 39.5%  | +71.7%           |
| Households by main heating means                                        |        |        |        |        |        |        |                  |
| Central heating                                                         | 73.5%  | 73.1%  | 72.1%  | 63.8%  | 47.0%  | 44.7%  | -39.2%           |
| Firewood stove                                                          | 5.9%   | 5.4%   | 6.7%   | 7.9%   | 11.6%  | 11.0%  | +86.4%           |

<sup>a</sup> defined as the proportion of the population living in households where the total equivalised disposable income is lower than 60% of the national median equivalised disposable income.

<sup>b</sup> defined as the share of the population whose total equivalised disposable income is lower than 60% of the national median equivalised disposable income of 2005, adjusted for inflation.

<sup>c</sup> defined as the proportion of the population aged 18-59 years living in a household where household members of working age worked <20% of their total work potential over the past year.

<sup>d</sup> defined as the proportion of the population that cannot afford at least three of the following items: to pay arrears on mortgage or rent payments, or utility bills, hire purchase instalments or other loan payments; to go on one week's annual holiday away from home; to have a meal with meat, chicken,

fish (or vegetarian equivalent) every second day; to face unexpected expenses; to have a telephone (including mobile phone); to have a colour TV; to have a washing machine; to have a car; or to keep their home adequately warm.

**Supplementary Table S2. Standardised mortality (per 100,000) by selected causes of death in Greece, 2001-2014.**

|                                                                 | 2001   | 2002   | 2003   | 2004   | 2005   | 2006   | 2007   | 2008  | 2009  | 2010  | 2011  | 2012  |
|-----------------------------------------------------------------|--------|--------|--------|--------|--------|--------|--------|-------|-------|-------|-------|-------|
| <b>Respiratory diseases</b>                                     | 77.5   | 82.8   | 79.4   | 80.4   | 84.6   | 88.9   | 99.6   | 97.3  | 99.4  | 92.4  | 89.2  | 93.9  |
| <b>All Neoplasms</b>                                            | 251.3  | 250.0  | 250.5  | 253.0  | 253.1  | 246.4  | 251.9  | 251.9 | 246.5 | 239.9 | 236.5 | 239.3 |
| <b>All Cardiovascular</b>                                       | 599.7  | 589.7  | 591.7  | 565.8  | 538.8  | 532.5  | 513.5  | 492.4 | 471.4 | 449.9 | 435.4 | 434.9 |
| <b>Ischaemic heart disease</b>                                  | 177.4  | 176.4  | 185.8  | 180.7  | 162.3  | 160.5  | 152.1  | 138.9 | 139.4 | 129.5 | 128.3 | 128.1 |
| <b>Cerebrovascular disease</b>                                  | 248.0  | 241.7  | 236.0  | 221.5  | 211.7  | 204.0  | 188.5  | 181.5 | 170.0 | 158.2 | 154.1 | 155.5 |
| <b>External causes</b>                                          | 41.2   | 37.6   | 37.8   | 38.6   | 39.1   | 36.9   | 37.7   | 34.9  | 34.9  | 31.9  | 30.9  | 30.9  |
| <b>Transport accidents</b>                                      | 18.6   | 17.2   | 16.4   | 18.2   | 17.8   | 16.7   | 16.2   | 15.5  | 14.8  | 12.9  | 12.1  | 10.8  |
| <b>Suicides and self-inflicted injury</b>                       | 3.7    | 3.5    | 4.0    | 3.8    | 4.3    | 4.2    | 3.4    | 3.9   | 4.0   | 3.8   | 4.8   | 5.1   |
| <b>Homicide and injury purposely inflicted by other persons</b> | 1.4    | 1.0    | 1.4    | 1.2    | 1.3    | 1.2    | 1.5    | 1.8   | 1.9   | 1.9   | 2.2   | 2.0   |
| <b>Signs, symptoms and ill- defined conditions</b>              | 124.2  | 132.0  | 140.1  | 139.4  | 138.2  | 114.8  | 128.6  | 109.0 | 116.4 | 143.8 | 162.5 | 167.1 |
| <b>Diseases of the digestive system</b>                         | 31.9   | 32.7   | 31.7   | 29.9   | 30.4   | 31.1   | 30.2   | 29.4  | 29.3  | 28.5  | 30.0  | 30.7  |
| <b>Diseases of the urinary system</b>                           | 21.5   | 18.8   | 18.3   | 18.3   | 18.7   | 22.4   | 27.5   | 27.0  | 21.9  | 21.6  | 19.6  | 19.9  |
| <b>All causes</b>                                               | 1086.3 | 1083.1 | 1084.1 | 1063.1 | 1043.4 | 1022.1 | 1037.6 | 997.9 | 976.3 | 956.4 | 946.0 | 959.1 |

Mortality rates have been standardised by gender and 5-year age groups, using the population of Greece in 2009 as the standard population.

Respiratory diseases include ICD-9 codes 460-519 and ICD-10 codes J00-J98; all neoplasms include ICD-9 codes 140-239 and ICD-10 codes C00-D48; cardiovascular diseases include ICD-9 codes 390-459 and ICD-10 codes I00-I99; ischaemic heart disease include ICD-9 codes 410-414 and ICD-10 codes I20-I25; cerebrovascular disease include ICD-9 codes 430-438 and ICD-10 codes I60-I69; hypertensive disease include ICD-9 codes 401-405 and ICD-10 codes I10-I15; external causes include ICD-9 codes e800-e999 and ICD-10 codes V01-Y89; transport accidents include ICD-9 codes E800-E848 and ICD-10 codes V01-V99, Y85; suicides and self-inflicted injury include ICD-9 codes E950-E959 and ICD-10 codes X64-X84, Y870; homicide and injury purposely inflicted by other persons include ICD-9 codes E960-E969 and ICD-10 codes X85-Y09, Y871; signs, symptoms and ill- defined conditions include ICD-9 codes 780-799 and ICD-10 codes R00-R99; diseases of the digestive system include ICD-9 codes 520-579 and ICD-10 codes K00-K92; and diseases of the urinary system include ICD-9 codes 580-629 and ICD-10 codes N00-N98.

**Supplementary Table S3. Standardised mortality (per 100,000) by geographic region in Greece, 2002-2014.**

|                                     | 2002 | 2003 | 2004 | 2005 | 2006 | 2007 | 2008 | 2009 | 2010 | 2011 | 2012 | 2013 |
|-------------------------------------|------|------|------|------|------|------|------|------|------|------|------|------|
| <b>Eastern Macedonia and Thrace</b> | 1196 | 1202 | 1167 | 1175 | 1148 | 1152 | 1095 | 1087 | 1103 | 1047 | 1051 | 1007 |
| <b>Central Macedonia</b>            | 1168 | 1170 | 1143 | 1127 | 1100 | 1107 | 1067 | 1030 | 1022 | 977  | 1004 | 926  |
| <b>Western Macedonia</b>            | 1053 | 1076 | 1062 | 1031 | 1007 | 1000 | 1008 | 968  | 961  | 937  | 951  | 901  |
| <b>Thessaly</b>                     | 1115 | 1051 | 1086 | 1007 | 986  | 1037 | 996  | 991  | 950  | 958  | 960  | 884  |
| <b>Epirus</b>                       | 942  | 931  | 923  | 909  | 898  | 895  | 906  | 845  | 797  | 825  | 824  | 798  |
| <b>Ionian Islands</b>               | 1073 | 1060 | 1031 | 977  | 1019 | 976  | 1022 | 972  | 889  | 875  | 930  | 876  |
| <b>Western Greece</b>               | 980  | 1032 | 1018 | 1032 | 1008 | 1016 | 991  | 981  | 961  | 945  | 964  | 908  |
| <b>Central Greece</b>               | 1001 | 1006 | 1006 | 971  | 963  | 1002 | 957  | 902  | 883  | 926  | 937  | 834  |
| <b>Peloponnese</b>                  | 948  | 953  | 934  | 920  | 944  | 955  | 934  | 928  | 902  | 895  | 916  | 835  |
| <b>Attica</b>                       | 1146 | 1138 | 1108 | 1082 | 1036 | 1059 | 987  | 986  | 964  | 959  | 965  | 918  |
| <b>North Aegean</b>                 | 991  | 1037 | 999  | 972  | 981  | 979  | 923  | 943  | 906  | 867  | 936  | 851  |
| <b>South Aegean</b>                 | 994  | 1017 | 946  | 965  | 923  | 960  | 894  | 914  | 897  | 929  | 899  | 845  |
| <b>Crete</b>                        | 982  | 1003 | 948  | 968  | 971  | 972  | 932  | 891  | 893  | 894  | 896  | 833  |

Mortality rates have been standardised for gender and 5-year age groups, using the population of Greece in 2009 as the standard population.

**Supplementary Table S4. Mortality by age group (per 100,000) in Greece, 2002-2015.**

| Age<br>(in years) | 2002  | 2003  | 2004  | 2005  | 2006  | 2007  | 2008  | 2009  | 2010  | 2011  | 2012  | 2013  |
|-------------------|-------|-------|-------|-------|-------|-------|-------|-------|-------|-------|-------|-------|
| <b>0 to 4</b>     | 115   | 92    | 98    | 93    | 90    | 89    | 73    | 84    | 93    | 78    | 67    | 74    |
| <b>5 to 9</b>     | 13    | 9     | 14    | 16    | 11    | 12    | 8     | 11    | 11    | 10    | 10    | 10    |
| <b>10 to 14</b>   | 11    | 13    | 13    | 15    | 11    | 11    | 10    | 13    | 11    | 14    | 9     | 11    |
| <b>15 to 19</b>   | 42    | 47    | 42    | 40    | 40    | 38    | 32    | 36    | 39    | 33    | 32    | 23    |
| <b>20 to 24</b>   | 65    | 62    | 69    | 74    | 65    | 68    | 56    | 67    | 57    | 57    | 52    | 43    |
| <b>25 to 29</b>   | 64    | 62    | 72    | 77    | 69    | 80    | 70    | 73    | 64    | 56    | 52    | 45    |
| <b>30 to 34</b>   | 70    | 72    | 75    | 73    | 71    | 75    | 73    | 84    | 74    | 68    | 70    | 62    |
| <b>35 to 39</b>   | 99    | 99    | 98    | 104   | 100   | 98    | 86    | 89    | 89    | 86    | 86    | 77    |
| <b>40 to 44</b>   | 155   | 156   | 147   | 146   | 144   | 158   | 142   | 144   | 137   | 133   | 132   | 122   |
| <b>45 to 49</b>   | 251   | 245   | 246   | 235   | 234   | 246   | 232   | 237   | 219   | 226   | 219   | 218   |
| <b>50 to 54</b>   | 370   | 376   | 382   | 384   | 389   | 378   | 359   | 361   | 356   | 357   | 354   | 346   |
| <b>55 to 59</b>   | 594   | 605   | 603   | 582   | 563   | 559   | 548   | 554   | 553   | 566   | 573   | 557   |
| <b>60 to 64</b>   | 851   | 839   | 843   | 815   | 827   | 856   | 851   | 817   | 815   | 791   | 807   | 796   |
| <b>65 to 69</b>   | 1413  | 1404  | 1368  | 1285  | 1258  | 1264  | 1186  | 1168  | 1143  | 1202  | 1257  | 1229  |
| <b>70 to 74</b>   | 2544  | 2425  | 2369  | 2291  | 2189  | 2228  | 2084  | 1991  | 1891  | 1861  | 1896  | 1788  |
| <b>75 to 79</b>   | 4532  | 4526  | 4388  | 4295  | 4060  | 4083  | 3832  | 3692  | 3557  | 3471  | 3511  | 3273  |
| <b>80 to 84</b>   | 7958  | 8008  | 7796  | 7728  | 7515  | 7637  | 7445  | 7274  | 7001  | 6826  | 7032  | 6408  |
| <b>85+</b>        | 16070 | 16475 | 16164 | 15988 | 16198 | 16473 | 16005 | 15868 | 16072 | 16041 | 16142 | 14975 |
| <b>TOTAL</b>      | 1083  | 1084  | 1063  | 1043  | 1022  | 1038  | 998   | 976   | 956   | 946   | 959   | 897   |

**Supplementary Table S5. Comparison between survey samples and census data.**

|                    |        | <b>Hellas Health 2006</b> | <b>Hellas Health 2008</b> | <b>Hellas Health 2010</b> | <b>Hellas Health 2011</b> | <b>Hellas Health 2015</b> | <b>Census 2001</b> | <b>Census 2011</b> |
|--------------------|--------|---------------------------|---------------------------|---------------------------|---------------------------|---------------------------|--------------------|--------------------|
| <b>Gender</b>      |        |                           |                           |                           |                           |                           |                    |                    |
|                    | Male   | 48.1%                     | 47.6%                     | 50.6%                     | 48.0%                     | 48.0%                     | 49.5%              | 49.0%              |
|                    | Female | 52.0%                     | 52.4%                     | 49.4%                     | 52.0%                     | 52.0%                     | 50.5%              | 51.0%              |
| <b>Age (years)</b> |        |                           |                           |                           |                           |                           |                    |                    |
|                    | 18-34  | 29.9%                     | 29.6%                     | 28.4%                     | 28.0%                     | 26.9%                     | 32.3%              | 27.0%              |
|                    | 35-54  | 32.9%                     | 34.7%                     | 37.2%                     | 36.5%                     | 35.0%                     | 33.4%              | 35.0%              |
|                    | ≥55    | 37.2%                     | 35.7%                     | 34.4%                     | 35.5%                     | 38.1%                     | 34.2%              | 38.0%              |
| <b>Residence</b>   |        |                           |                           |                           |                           |                           |                    |                    |
|                    | Urban  | 74.6%                     | 69.5%                     | 72.1%                     | 72.4%                     | 77.5%                     | 72.2%              | 74.5%              |
|                    | Rural  | 25.6%                     | 30.5%                     | 27.9%                     | 27.6%                     | 22.5%                     | 27.8%              | 25.5%              |
